# Supplementary material
Source: MDPI journal article supplement (https://www.mdpi.com/1424-2818/14/5/350)
Supplement: s1 [file s1]

## Supplementary materials

**Table S1.** Oligonucleotide primers used in this study.

| Target gene | Primer        | Sequence (5' to 3')      | Predicted size (bp) | Reference |
|-------------|---------------|--------------------------|---------------------|-----------|
| 16S rDNA    | 27-F          | AGAGTTTGATCCTGGCTCAG     | 1,500               | [13]      |
|             | 1492-R        | TACGGCTACCTTGTACGAC      |                     |           |
| <i>tdh</i>  | <i>tdh</i> -F | GTAAAGGTCTCTGACTTTTGGAC  | 269                 | [13]      |
|             | <i>tdh</i> -R | GGAATAGAACCTTCATCTTCACC  |                     |           |
| <i>trh</i>  | <i>trh</i> -F | TTGGCTTCGATATTTTCAGTATCT | 500                 | [13]      |
|             | <i>trh</i> -R | CATAACAAACATATGCCCATTTC  |                     |           |

**Table S2.** The identified GIs in the six *V. parahaemolyticus* genomes.

| <i>V. parahaemolyticus</i> isolate | GI ID | Location    | Scaffold size (bp) | Start (bp) | End (bp) | CDS gene | COG gene |
|------------------------------------|-------|-------------|--------------------|------------|----------|----------|----------|
| L7_7                               | GI 1  | Scaffold 2  | 537,433            | 520,198    | 533,845  | 14       | 10       |
|                                    | GI 2  | Scaffold 11 | 165,828            | 82,015     | 105,291  | 15       | 9        |
|                                    | GI 3  | Scaffold 12 | 163,666            | 3,027      | 13,476   | 11       | 5        |
|                                    | GI 4  | Scaffold 15 | 117,372            | 9,480      | 25,462   | 20       | 8        |
|                                    | GI 5  | Scaffold 18 | 87,591             | 38,174     | 65,569   | 24       | 23       |
|                                    | GI 6  | Scaffold 20 | 67,327             | 18,229     | 35,367   | 20       | 14       |
| N1-22                              | GI 1  | Scaffold 1  | 1,138,216          | 332,673    | 418,529  | 79       | 16       |
|                                    | GI 2  | Scaffold 2  | 851,121            | 215,670    | 240,066  | 26       | 18       |
|                                    | GI 3  | Scaffold 2  | 851,121            | 332,299    | 345,198  | 10       | 5        |
|                                    | GI 4  | Scaffold 2  | 851,121            | 86,080     | 95,320   | 7        | 5        |
|                                    | GI 5  | Scaffold 4  | 558,996            | 368,668    | 406,329  | 29       | 13       |
|                                    | GI 6  | Scaffold 6  | 348,360            | 182,705    | 213,595  | 24       | 12       |
|                                    | GI 7  | Scaffold 7  | 249,645            | 149,195    | 180,176  | 29       | 19       |
|                                    | GI 8  | Scaffold 9  | 133,586            | 913        | 13,741   | 13       | 6        |
|                                    | GI 9  | Scaffold 10 | 124,863            | 21,112     | 35,850   | 18       | 12       |
| N3-33                              | GI 1  | Scaffold 1  | 815,932            | 679,258    | 690,241  | 11       | 4        |
|                                    | GI 2  | Scaffold 1  | 815,932            | 793,795    | 810,371  | 12       | 9        |
|                                    | GI 3  | Scaffold 5  | 329,323            | 274,185    | 297,314  | 33       | 7        |
|                                    | GI 4  | Scaffold 7  | 237,962            | 149,488    | 168,293  | 16       | 12       |
|                                    | GI 5  | Scaffold 9  | 184,635            | 2,319      | 9,214    | 7        | 4        |
|                                    | GI 6  | Scaffold 10 | 161,468            | 1,073      | 7,750    | 8        | 5        |
| N4_46                              | GI 1  | Scaffold 1  | 816,784            | 1,601      | 15,956   | 15       | 9        |
|                                    | GI 2  | Scaffold 1  | 816,784            | 687,093    | 713,968  | 21       | 15       |
|                                    | GI 3  | Scaffold 8  | 202,489            | 101,075    | 105,707  | 7        | 1        |
|                                    | GI 4  | Scaffold 8  | 202,489            | 127,554    | 144,961  | 16       | 12       |
|                                    | GI 5  | Scaffold 14 | 99,227             | 51,180     | 63,901   | 13       | 6        |
|                                    | GI 6  | Scaffold 15 | 60,986             | 489        | 9,030    | 12       | 2        |
| N8_42                              | GI 1  | Scaffold 1  | 1,070,881          | 782,122    | 802,295  | 26       | 9        |
|                                    | GI 2  | Scaffold 3  | 552,513            | 151,970    | 183,907  | 28       | 13       |
|                                    | GI 3  | Scaffold 4  | 508,421            | 499,417    | 503,439  | 3        | 3        |
|                                    | GI 4  | Scaffold 5  | 436,482            | 292,305    | 308,974  | 15       | 12       |
|                                    | GI 5  | Scaffold 7  | 185,860            | 69,424     | 87,114   | 16       | 11       |
|                                    | GI 6  | Scaffold 9  | 160,850            | 4,534      | 22,139   | 13       | 7        |
|                                    | GI 7  | Scaffold 12 | 122,913            | 19,798     | 32,666   | 17       | 11       |
| Q8-15                              | GI 1  | Scaffold 1  | 1,750,007          | 798,843    | 822,531  | 23       | 9        |

|      |            |           |           |           |    |    |
|------|------------|-----------|-----------|-----------|----|----|
| GI 2 | Scaffold 2 | 1,320,740 | 1,232,265 | 1,249,025 | 16 | 11 |
| GI 3 | Scaffold 2 | 1,320,740 | 1,355     | 13,342    | 17 | 8  |
| GI 4 | Scaffold 4 | 538,126   | 176,674   | 198,941   | 19 | 10 |
| GI 5 | Scaffold 6 | 109,343   | 88,831    | 102,356   | 9  | 8  |

**Table S3.** The identified prophages in the *V. parahaemolyticus* genomes.

| <i>V. parahaemolyticus</i><br>isolate | Prophage ID | Location    | Scaffold size (bp) | Start (bp) | End (bp) | Possible phage               | NCBI accession No. |
|---------------------------------------|-------------|-------------|--------------------|------------|----------|------------------------------|--------------------|
| N1-22                                 | Ph01        | Scaffold 2  | 851,121            | 232,499    | 264,407  | <i>Vibrio</i> _phage_K139    | NC_003313          |
| N4-46                                 | Ph01        | Scaffold 20 | 47,985             | 160        | 22,773   | <i>Pseudomonas</i> _phage_D3 | NC_002484          |
| N8-42                                 | Ph01        | Scaffold 5  | 436,482            | 267,809    | 300,776  | <i>Vibrio</i> _phage_K139    | NC_003313          |
|                                       | Ph02        | Scaffold 1  | 1,070,881          | 785,045    | 795,581  | <i>Vibrio</i> _phage_fs2     | NC_001956          |
| Q8-15                                 | Ph01        | Scaffold 2  | 1,320,740          | 467,112    | 489,931  | <i>Pseudomonas</i> _phage_D3 | NC_002484          |

**Table S4.** The identified ISs in the *V. parahaemolyticus* genomes.

| <i>V. parahaemolyticus</i><br>isolate | IS ID | Location    | Scaffold size (bp) | Start (bp) | End (bp) | IS Family |
|---------------------------------------|-------|-------------|--------------------|------------|----------|-----------|
| L7-7                                  | IS001 | Scaffold 30 | 17,420             | 14,615     | 15,847   | IS3       |
|                                       | IS002 | Scaffold 42 | 1,055              | 2          | 1,055    | IS5       |
|                                       | IS003 | Scaffold 5  | 317,607            | 259,342    | 260,304  | IS5       |
| N3-33                                 | IS001 | Scaffold 10 | 161,468            | 2,682      | 3,711    | IS3       |
| N8-42                                 | IS001 | Scaffold 5  | 436,482            | 299,512    | 300,931  | IS91      |
| Q8-15                                 | IS001 | Scaffold 1  | 1,750,007          | 257,621    | 258,583  | IS5       |

**Table S5.** The identified repeats at the end of scaffolds of the *V. parahaemolyticus* genomes

| <i>V. parahaemolyticus</i><br>isolate | Repeat ID        | Location    | Scaffold size<br>(bp) | Repeat  |         |             |
|---------------------------------------|------------------|-------------|-----------------------|---------|---------|-------------|
|                                       |                  |             |                       | Start   | End     | Length (bp) |
| L7-7                                  | Scaffold 1_TR01  | Scaffold 1  | 640,149               | 1       | 788     | 788         |
|                                       | Scaffold 1_TR02  | Scaffold 1  | 640,149               | 1       | 922     | 922         |
|                                       | Scaffold 6_TR22  | Scaffold 6  | 314,969               | 314,270 | 314,969 | 700         |
|                                       | Scaffold 11_TR29 | Scaffold 11 | 165,828               | 1       | 542     | 542         |
|                                       | Scaffold 16_TR38 | Scaffold 16 | 93,035                | 1       | 284     | 284         |
|                                       | Scaffold 19_TR39 | Scaffold 19 | 72,724                | 1       | 492     | 492         |
| N8-42                                 | Scaffold 4_TR14  | Scaffold 4  | 508,421               | 2       | 887     | 886         |
|                                       | Scaffold 15_TR47 | Scaffold 15 | 52,447                | 51,920  | 52,447  | 528         |
|                                       | Scaffold 25_TR56 | Scaffold 25 | 9,075                 | 7,847   | 9,072   | 1,226       |
|                                       | Scaffold 35_TR63 | Scaffold 35 | 1,131                 | 507     | 1,131   | 625         |
| N3-33                                 | Scaffold 18_TR41 | Scaffold 18 | 61,769                | 1       | 554     | 554         |
|                                       | Scaffold 42_TR57 | Scaffold 42 | 887                   | 1       | 887     | 887         |
| N4-46                                 | Scaffold 6_TR12  | Scaffold 6  | 315,367               | 1       | 400     | 400         |
|                                       | Scaffold 15_TR34 | Scaffold 15 | 60,986                | 59,989  | 60,986  | 998         |
|                                       | Scaffold 16_TR35 | Scaffold 16 | 60,880                | 60,576  | 60,880  | 305         |
|                                       | Scaffold 18_TR39 | Scaffold 18 | 52,044                | 51,287  | 52,044  | 758         |
|                                       | Scaffold 28_TR46 | Scaffold 28 | 9,441                 | 8,222   | 9,441   | 1,220       |
| Q8-15                                 | Scaffold 7_TR38  | Scaffold 7  | 89,261                | 88,746  | 89,261  | 516         |
|                                       | Scaffold 32_TE45 | Scaffold 32 | 379                   | 272     | 379     | 108         |
